# Supplementary material
Source: publisher figshare collection journal article supplement (https://asha.figshare.com/articles/dataset/_/14515542)
Supplement: Supplementary file 1 [file 1]

**Supplemental Material S1.** Pearson correlations between all variables used in analyses.

| Measure                          | 1 | 2   | 3    | 4     | 5     | 6      | 7      | 8    | 9    | 10    | 11   | 12    | 13    | 14     | 15     | 16     | 17     | 18     |
|----------------------------------|---|-----|------|-------|-------|--------|--------|------|------|-------|------|-------|-------|--------|--------|--------|--------|--------|
| 1. SEQ Seeking                   | — | .28 | -.02 | .52** | -.01  | -.08   | .06    | .03  | .14  | -.02  | .02  | -.26  | -.24  | -.17   | .08    | .06    | .07    | -.04   |
| 2. SEQ Hyper                     |   | —   | .36* | .12   | .47** | .51**  | .40**  | -.10 | .02  | .16   | -.08 | -.24  | -.03  | .13    | .37*   | .34*   | .02    | -.10   |
| 3. SEQ Hypo                      |   |     | —    | .13   | .13   | .47**  | .45**  | .08  | -.19 | .07   | -.11 | -.12  | -.11  | -.15   | -.28   | -.24   | -.39*  | -.37*  |
| 4. SP Sensation Seeking          |   |     |      | —     | -.05  | .00    | .26    | .23  | -.05 | -.23  | -.19 | .22   | .27   | .41**  | .28    | .29    | .28    | .41*   |
| 5. SP Sensory Sensitivity        |   |     |      |       | —     | .66*** | .43**  | .25  | .11  | -.07  | .14  | .01   | -.03  | -.03   | -.21   | -.19   | -.10   | .21    |
| 6. SP Sensation Avoiding         |   |     |      |       |       | —      | .59*** | .27  | -.01 | -.15  | .14  | .14   | -.12  | .01    | -.05   | -.03   | .10    | .21    |
| 7. SP Low Registration           |   |     |      |       |       |        | —      | .16  | .14  | -.35* | .03  | .16   | .11   | .13    | .13    | .11    | .42*   | .46**  |
| 8. SPA Seeking                   |   |     |      |       |       |        |        | —    | -.10 | .00   | .01  | -.01  | -.03  | -.04   | .13    | .13    | .07    | .09    |
| 9. SPA Avoidance                 |   |     |      |       |       |        |        |      | —    | -.05  | .29  | -.02  | -.19  | -.25   | -.04   | -.09   | .01    | -.04   |
| 1. SPA Orienting                 |   |     |      |       |       |        |        |      |      | —     | .28  | -.03  | -.16  | -.13   | -.10   | -.13   | -.26   | -.25   |
| 11. TSFI Hyper                   |   |     |      |       |       |        |        |      |      |       | —    | -.33* | -.37* | -.17   | -.35*  | -.43*  | -.29   | -.42** |
| 12. TSFI Hypo                    |   |     |      |       |       |        |        |      |      |       |      | —     | .28   | -.07   | .15    | .17    | .00    | .11    |
| 13. MSEL Rec Language AEQ        |   |     |      |       |       |        |        |      |      |       |      |       | —     | .53*** | .52*** | .53*** | .54*** | .57*** |
| 14. MSEL Exp Language AEQ        |   |     |      |       |       |        |        |      |      |       |      |       |       | —      | .43**  | .47**  | .35*   | .65*** |
| 15. MCDI Rec Vocabulary          |   |     |      |       |       |        |        |      |      |       |      |       |       |        | —      | .98*** | .59*** | .53*** |
| 16. MCDI Exp Vocabulary          |   |     |      |       |       |        |        |      |      |       |      |       |       |        |        | —      | .59*** | .58*** |
| 17. VABS-2 Rec Communication AEQ |   |     |      |       |       |        |        |      |      |       |      |       |       |        |        |        | —      | .70*** |
| 18. VABS-2 Exp Communication AEQ |   |     |      |       |       |        |        |      |      |       |      |       |       |        |        |        |        | —      |

*Note.* SEQ = Sensory Experiences Questionnaire (Baranek et al., 2006); SP = Sensory Profile (Dunn, 1999); SPA = Sensory Processing Assessment (Baranek, 1999b); TSFI = Test of Sensory Function in Infants (DeGangi & Greenspan, 1989); MSEL = Mullen Scales of Early Learning (Mullen, 1995); MCDI = MacArthur-Bates Communicative Development Inventories (Fenson et al., 2007); VABS-2 = Vineland Adaptive Behavior Scales, Second Edition (Sparrow et al., 2005); Seeking = Sensory Seeking; Hyper = Hyperresponsiveness; Hypo = Hyporesponsiveness; Rec = Receptive; Exp = Expressive; AEQ = Age equivalency scores. Raw scores from the SP were reflected in these analyses; thus, positive correlations between the SP and SEQ indicate increased alignment or convergence (i.e., associations in the anticipated direction) for variables derived from these measures.

\* $p < .05$ . \*\* $p < .01$ . \*\*\* $p < .001$ .
