# Supplementary material
Source: publisher figshare collection journal article supplement (https://asha.figshare.com/articles/dataset/_/14515542)
Supplement: Supplementary file 2 [file 1]

**Supplemental Material S2.** Partial correlations between indices of sensory responsiveness and communication controlling for chronological age.

| <b>Sensory Index</b>  | <b>Expressive Communication</b> | <b>Receptive Communication</b> |
|-----------------------|---------------------------------|--------------------------------|
| PR Seeking            | -.17                            | -.05                           |
| PR Hypo               | -.36*                           | -.36*                          |
| PR Hyper              | -.22                            | -.08                           |
| SPA Seeking           | -.01                            | .02                            |
| SPA Orienting (Hypo)  | -.20                            | -.21                           |
| SPA Avoidance (Hyper) | -.27                            | -.21                           |
| TSFI Hypo             | .06                             | .22                            |
| TSFI Hyper            | -.32*                           | -.39*                          |

*Note.* PR = Parent reported; Hypo = Hyporesponsiveness; Hyper = Hyperresponsiveness; SPA = Sensory Processing Assessment (Baranek, 1999); TSFI = Test of Sensory Functioning in Infants (DeGangi & Greenspan, 1989).

\* $p < .05$ .
